# Supplementary material for: Analysis of Dengue Virus Genetic Diversity during Human and Mosquito Infection Reveals Genetic Constraints
Source: PLOS journal article supplement (doi:10.1371/journal.pntd.0004044), 2015-09-01
Supplement: S13 (10.1371/journal.pntd.0004044.s013) [file journal.pntd.0004044.s013]

## S13 File

*Mutation rate, diversity and evenness across the polyprotein*

|                         | <u># Snps per 100bp</u> | <u>Shannon diversity index</u> | <u>Shannon equitability</u> |
|-------------------------|-------------------------|--------------------------------|-----------------------------|
| <b>Early Aegypti</b>    | 0.397                   | 1.098                          | 0.187                       |
| <b>Early Albopictus</b> | 0.501                   | 1.22                           | 0.2                         |
| <b>Early Human</b>      | 0.438                   | 1.314                          | 0.22                        |
| <b>Late Aegypti</b>     | 0.536                   | 1.071                          | 0.173                       |
| <b>Late Albopictus</b>  | 0.406                   | 1.152                          | 0.195                       |
| <b>Late Human</b>       | 0.566                   | 1.285                          | 0.206                       |

**S13 File. Mutation rate, diversity and evenness across the polyprotein.** The number of mutations in a 100bp window were calculated across the genome. Diversity and evenness of the nucleotide type change ( $A \leftrightarrow G$ ,  $C \leftrightarrow T$ ,  $A \leftrightarrow C$ ,  $G \leftrightarrow T$ ,  $G \leftrightarrow C$ ,  $A \leftrightarrow T$ ) were calculated using the Shannon diversity index and Shannon equitability measurement respectively
